# Supplementary material for: Anti-cancer Effects of a Novel Quinoline Derivative 83b1 on Human Esophageal Squamous Cell Carcinoma through Down-Regulation of COX-2 mRNA and PGE2
Source: PubMed Central journal article supplement — Cancer Res Treat. 2016 Jul 18;49(1):219–29. doi: 10.4143/crt.2016.190 (PMC5266386; doi:10.4143/crt.2016.190), 2016-07-18
Supplement: crt-2016-190-supple.pdf [file crt-2016-190-supple.pdf]

# Anti-cancer Effects of a Novel Quinoline Derivative 83b1 on Human Esophageal Squamous Cell Carcinoma through Down-Regulation of COX-2 mRNA and PGE<sub>2</sub>

Ivan Ho Yuen Pun, BSc<sup>1</sup>, Dessy Chan, BSc<sup>1</sup>, Sau Hing Chan, PhD<sup>1</sup>, Po Yee Chung, BSc<sup>1</sup>, Yuan Yuan Zhou, MSc<sup>1</sup>,  
Simon Law, MBChir, MS<sup>2</sup>, Alfred King Yin Lam, MD, PhD<sup>3</sup>, Chung Hin Chui, PhD<sup>4</sup>, Albert Sun Chi Chan, PhD<sup>5</sup>,  
Kim Hung Lam, PhD<sup>1</sup>, Johnny Cheuk On Tang, PhD<sup>1</sup>

<sup>1</sup>State Key Laboratory of Chirosciences, Lo Ka Chung Centre for Natural Anti-cancer Drug Development,  
Department of Applied Biology and Chemical Technology, The Hong Kong Polytechnic University, Hong Kong,

<sup>2</sup>Department of Surgery, Li Ka Shing Faculty of Medicine, The University of Hong Kong, Hong Kong, China,

<sup>3</sup>Department of Pathology, Griffith Medical School and Griffith Health Institute, Griffith University, Gold Coast, Queensland, Australia,

<sup>4</sup>Clinical Division, School of Chinese Medicine, Hong Kong Baptist University, Hong Kong,

<sup>5</sup>Sun Yat Sen University, School of Pharmaceutical Sciences, Guangzhou, China

## Supplementary Data

### Table of Contents

|                             |   |
|-----------------------------|---|
| Supplementary Fig. S1 ..... | 2 |
| Supplementary Fig. S2 ..... | 3 |
| Supplementary Fig. S3 ..... | 4 |

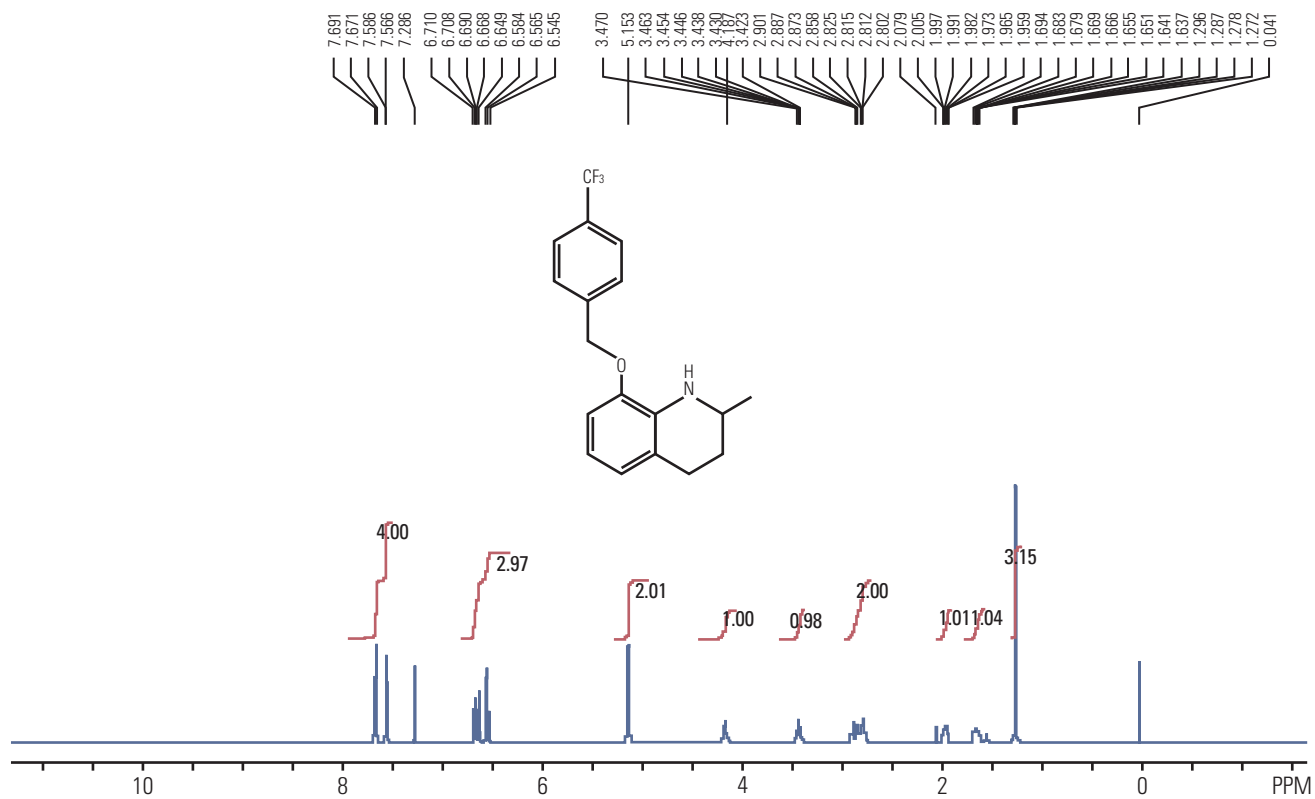

Supplementary Fig. S1. <sup>1</sup>H-NMR spectrum of 83b1.

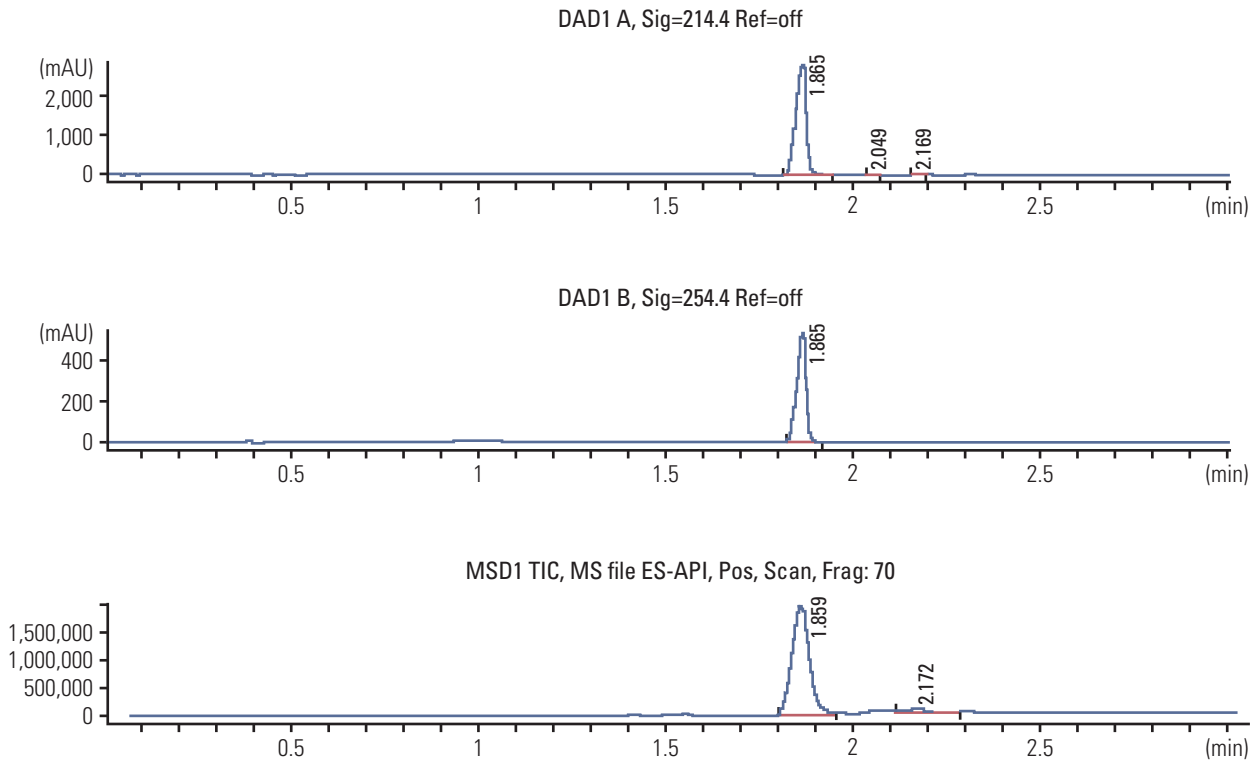

#### Integration results for ELS1 A, Voltage

| RetTim | Width | Area | Height | Area |
|--------|-------|------|--------|------|
|--------|-------|------|--------|------|

#### Integration results for DAD1 A, Sig=214.4 Ref=off

| RetTim | Width | Area     | Height   | Area  |
|--------|-------|----------|----------|-------|
| 1.87   | 0.03  | 5,477.53 | 2,844.69 | 99.70 |
| 2.05   | 0.01  | 9.68     | 10.85    | 0.18  |
| 2.17   | 0.01  | 6.74     | 6.92     | 0.12  |

#### Integration results for DAD1 B, Sig=254.4 Ref=off

| RetTim | Width | Area   | Height | Area   |
|--------|-------|--------|--------|--------|
| 1.87   | 0.02  | 898.46 | 534.87 | 100.00 |

**Supplementary Fig. S2.** Purification of 83b1 through high-performance liquid chromatography. ES-API, electrospray atmospheric pressure ionization.

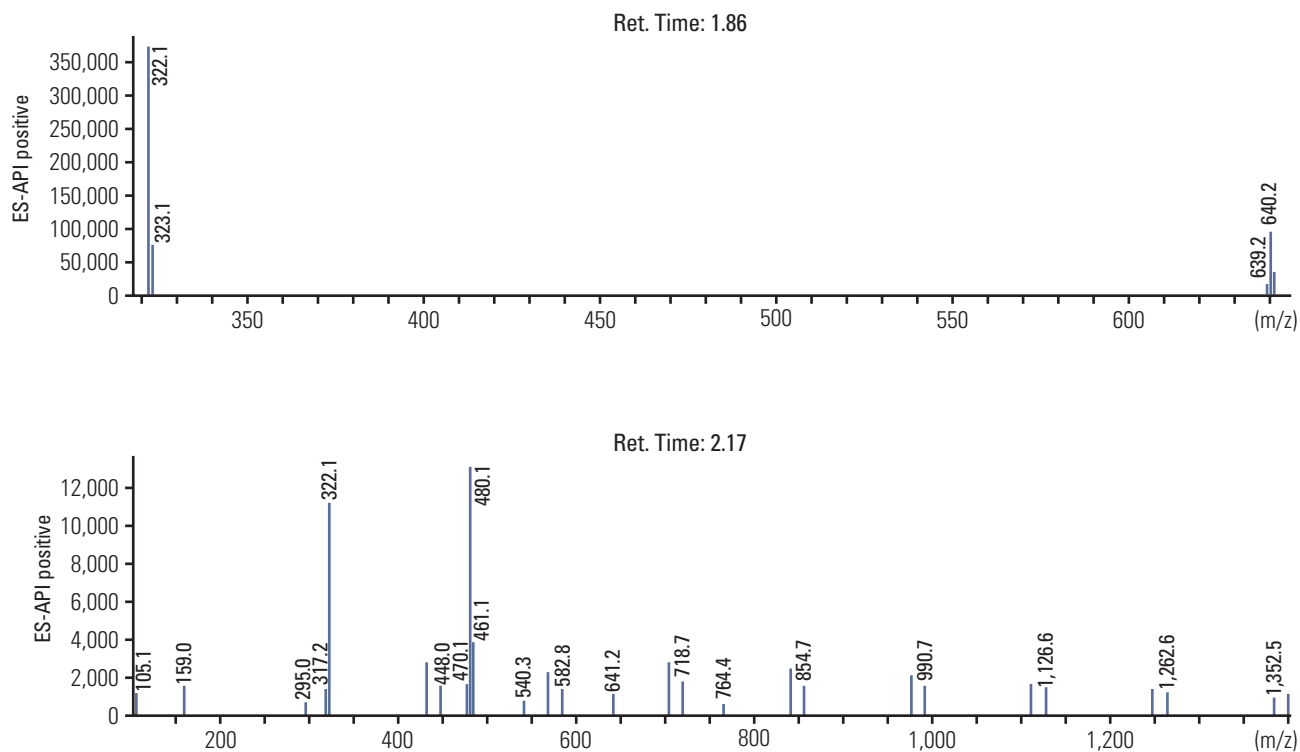

**Supplementary Fig. S3.** Examination of the molecular weight and purity of 83b1 through high-performance liquid chromatography followed by electrospray ionisation mass spectrometry. ES-API, electrospray atmospheric pressure ionization.
